# Supplementary material for: Temperature and concentration calibration of aqueous polyvinylpyrrolidone (PVP) solutions for isotropic diffusion MRI phantoms
Source: PLoS One. 2017 Jun 19;12(6):e0179276. doi: 10.1371/journal.pone.0179276 (PMC5476261; doi:10.1371/journal.pone.0179276)
Supplement: S2 File — (DOCX) [file pone.0179276.s002.docx]

Supplemental Material 2: Separate Evaluation for 1.5 T and 3 T

Tables A1 and A2 provide the fitted parameters and using only the data acquired at 1.5 T. Tables A3 and A4 provide the fitted parameters and using only the data acquired at 3 T.

Tab. A1: Measurements for K30 at 1.5 T: Fit parameters describing the dependency of on the temperature (see Eq. (2)) for K30 and data acquired at 1.5 T. 95% confidence intervals are stated in brackets.

| [% (w/w)] | [µm²/ms] | [1/K] |
| --- | --- | --- |
| 0 | 2.063 (2.057, 2.069) | 0.02654 (0.02604, 0.02703) |
| 10 | 1.597 (1.596, 1.598) | 0.0253 (0.02514, 0.02545) |
| 20 | 1.200 (1.198, 1.202) | 0.02717 (0.02686, 0.02748) |
| 30 | 0.8357 (0.8337, 0.8376) | 0.02904 (0.02862, 0.02946) |
| 40 | 0.5419 (0.5398, 0.5441) | 0.03189 (0.03118, 0.03259) |
| 50 | 0.3262 (0.3243, 0.3282) | 0.03245 (0.03138, 0.03351) |

Tab. A2: Measurements for K90 at 1.5 T: Fit parameters describing the dependency of on the temperature (see Eq. (2)) for K90 and data acquired at 1.5 T. 95% confidence intervals are stated in brackets.

| [% (w/w)] | [µm²/ms] | [1/K] |
| --- | --- | --- |
| 10 | 1.610 (1.608, 1.613) | 0.02391 (0.02361, 0.02421) |
| 20 | 1.185 (1.182, 1.187) | 0.02474 (0.02434, 0.02513) |
| 30 | 0.8088 (0.8068, 0.8109) | 0.02825 (0.02779, 0.02871) |

Tab. A3: Measurements at 3 T: Fit parameters describing the dependency of on the temperature (see Eq. (2)) for K30 and data acquired at 3 T. 95% confidence intervals are stated in brackets.

| [% (w/w)] | [µm²/ms] | [1/K] |
| --- | --- | --- |
| 0 | 2.038 (2.034, 2.041) | 0.02583 (0.02555, 0.0261) |
| 10 | 1.589 (1.587, 1.590) | 0.02533 (0.02519, 0.02548) |
| 20 | 1.191 (1.189, 1.192) | 0.02788 (0.02771, 0.02804) |
| 30 | 0.8453 (0.8437, 0.847) | 0.02995 (0.02967, 0.03023) |
| 40 | 0.5557 (0.5541, 0.5572) | 0.03287 (0.03248, 0.03326) |
| 50 | 0.3450 (0.3413, 0.3486) | 0.03318 (0.03167, 0.03469) |

Tab. A4: Measurements for K90 at 3 T: Fit parameters describing the dependency of on the temperature (see Eq. (2)) for K90 and data acquired at 3 T. 95% confidence intervals are stated in brackets.

| [% (w/w)] | [µm²/ms] | [1/K] |
| --- | --- | --- |
| 10 | 1.579 (1.577, 1.581) | 0.02528 (0.02511, 0.02546) |
| 20 | 1.181 (1.179, 1.183) | 0.02606 (0.02578, 0.02634) |
| 30 | 0.8166 (0.8153, 0.8178) | 0.02958 (0.02935, 0.02981) |
